# Supplementary material for: Coactosin Phosphorylation Controls Entamoeba histolytica Cell Membrane Protrusions and Cell Motility
Source: PubMed Central journal article supplement (PMC7407079; doi:10.1128/mbio.00660-20), 2020-08-04

**Supplemental Figure 2:** Multiple sequence alignment of Coactosin homologs from selected species. The species names are indicated on the left. The *E. histolytica* Coactosin row is marked with a red border and the amino acid position corresponding to S147 of EhCoactosin is marked with a black box and an asterisk.

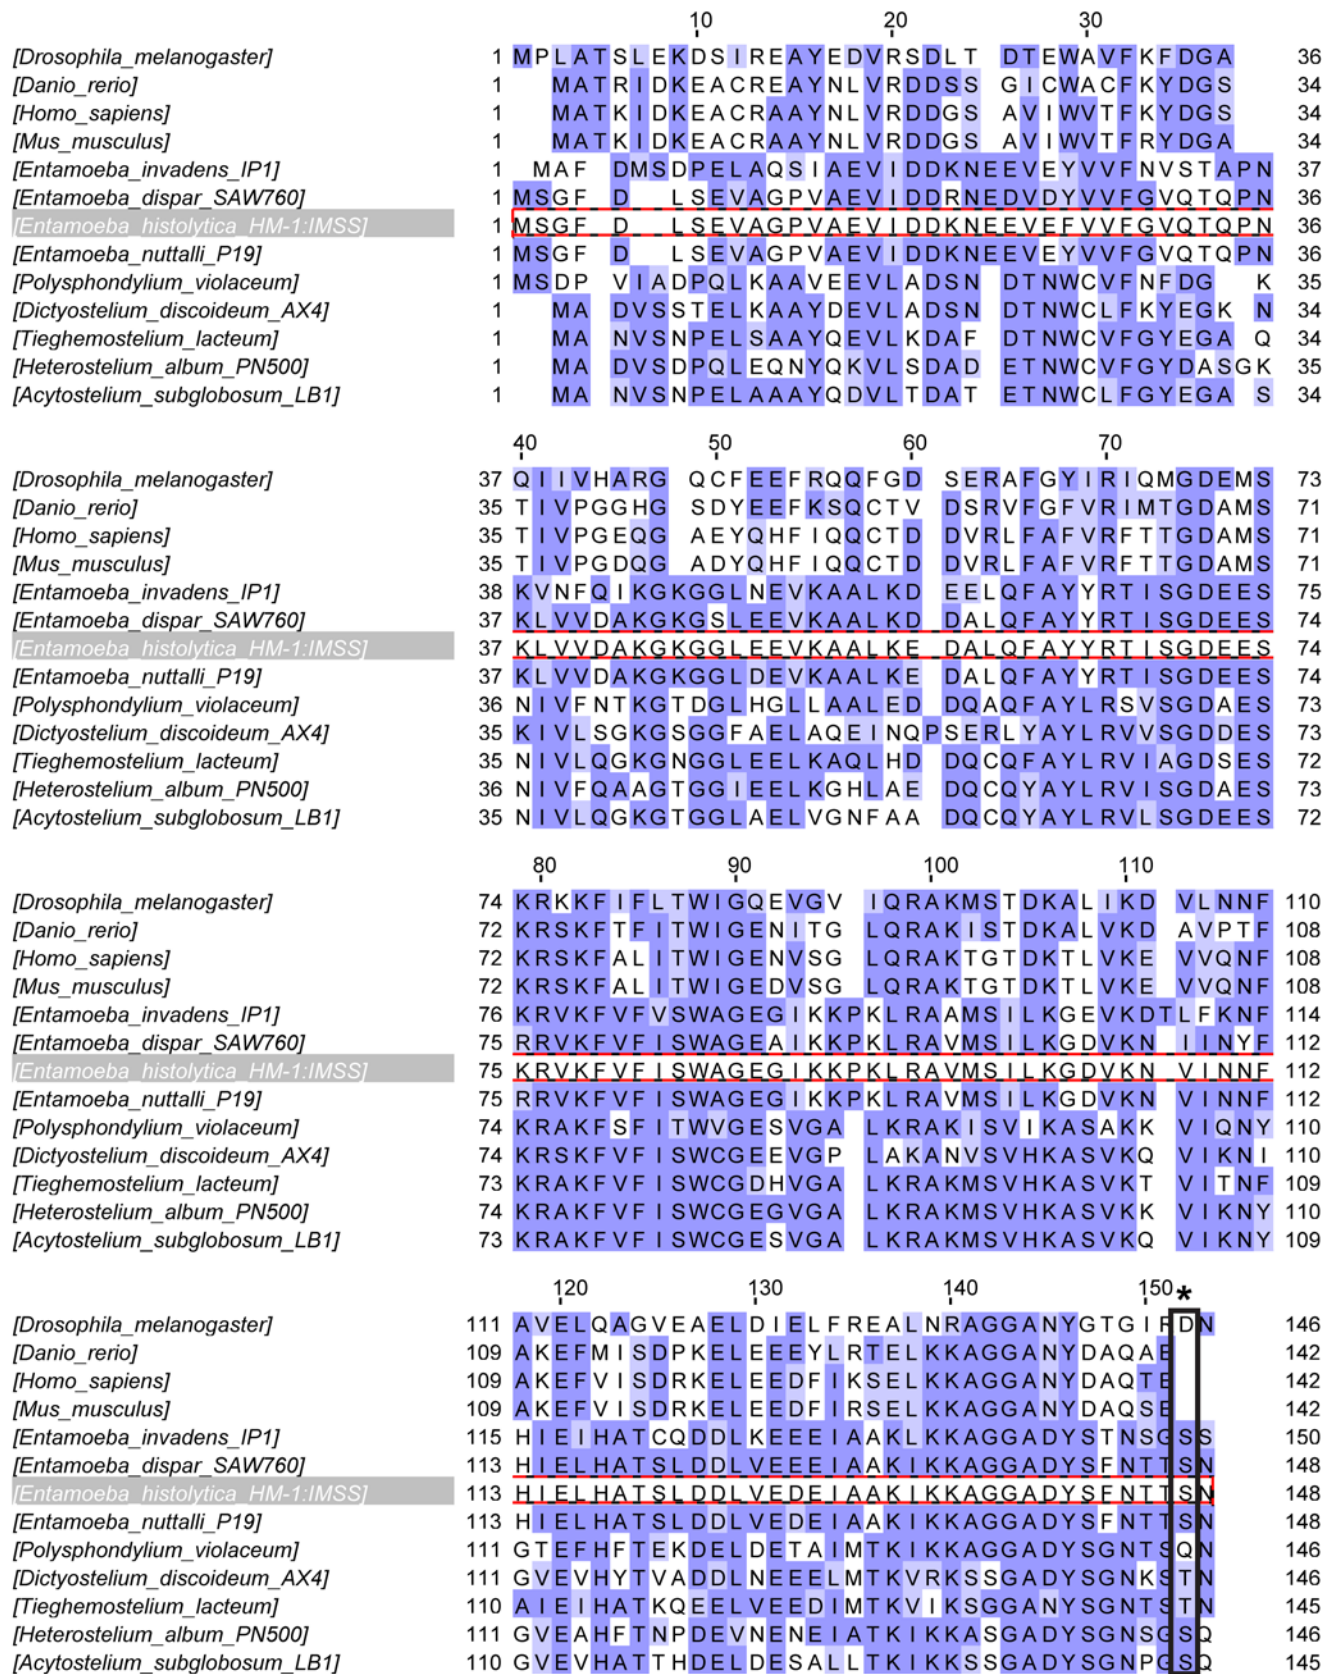

Supplement: mBio.00660-20-sf002.pdf [file mBio.00660-20-sf002.pdf]
