# Supplementary material for: Coactosin Phosphorylation Controls Entamoeba histolytica Cell Membrane Protrusions and Cell Motility
Source: PubMed Central journal article supplement (PMC7407079; doi:10.1128/mbio.00660-20), 2020-08-04
Supplement: mBio.00660-20-st001.pdf [file mBio.00660-20-st001.pdf]

**Supplemental Table 1. Proteins that are differentially expressed following *EhMSP-1* silencing.**

| Accession             | Protein                                                            | Peptide | Peptide unique | EhMSP-1 (-) / WT | P value |
|-----------------------|--------------------------------------------------------------------|---------|----------------|------------------|---------|
| EHI_182990A-p1        | histone H2B, putative                                              | 2       | 2              | 0.83             | 9.8E-05 |
| EHI8A_039580-t26_1-p1 | hypothetical protein                                               | 2       | 2              | 0.85             | 0.0004  |
| EHI_104560A-p1        | cortexillin, putative                                              | 15      | 15             | 0.74             | 0.0005  |
| EHI_183460A-p1        | elongation factor 1 beta, putative                                 | 5       | 5              | 0.75             | 0.0006  |
| EHI_020270A-p1        | ubiquitin-activating enzyme, putative                              | 8       | 8              | 0.70             | 0.0010  |
| EHI_005890A-p1        | 60S ribosomal protein L3, putative                                 | 8       | 8              | 2.51             | 0.0013  |
| EHI7A_159750-t26_1-p1 | 4Fe-4S binding domain containing protein                           | 12      | 1              | 2.52             | 0.0014  |
| EHI_153060A-p1        | acyl-CoA synthetase, putative                                      | 2       | 2              | 0.68             | 0.0020  |
| EHI_148480A-p1        | WD domain containing protein                                       | 6       | 6              | 1.29             | 0.0020  |
| EHI_068620A-p1        | hypothetical protein                                               | 1       | 1              | 0.31             | 0.0024  |
| EHI_076870A-p1        | 3-oxo-5-alpha-steroid 4-dehydrogenase domain-containing protein    | 6       | 6              | 0.73             | 0.0031  |
| EHI_003010A-p1        | ubiquitin-conjugating enzyme family protein                        | 4       | 3              | 2.08             | 0.0037  |
| EHI_169670A-p1        | hypothetical protein                                               | 9       | 9              | 0.66             | 0.0040  |
| EHI_132880A-p1        | eukaryotic translation initiation factor 2 gamma subunit, putative | 2       | 2              | 0.53             | 0.0042  |
| EHI_092080A-p1        | hypothetical protein, conserved                                    | 7       | 7              | 0.64             | 0.0047  |
| EHI_176140A-p1        | profilin, putative                                                 | 5       | 5              | 1.34             | 0.0049  |
| EHI_152650A-p1        | type A flavoprotein, putative                                      | 30      | 30             | 1.47             | 0.0049  |
| EHI_186840A-p1        | actin-binding protein, cofilin/tropomyosin family                  | 10      | 10             | 0.70             | 0.0053  |
| EHI_035980A-p1        | hypothetical protein                                               | 2       | 2              | 1.31             | 0.0054  |
| EHI_186480A-p1        | translation initiation factor eIF-5A, putative                     | 12      | 12             | 1.16             | 0.0055  |
| EHI_173410A-p1        | mucin-2 precursor, putative                                        | 1       | 1              | 0.89             | 0.0057  |
| EHI_148470A-p1        | asparagine synthetase A, putative                                  | 8       | 8              | 1.29             | 0.0058  |
| EHI_126140A-p1        | 60S ribosomal protein L9, putative                                 | 7       | 2              | 0.04             | 0.0059  |
| EHI_117890A-p1        | Rab family GTPase                                                  | 1       | 1              | 0.52             | 0.0067  |
| EHI_197010A-p1        | hypothetical protein                                               | 8       | 8              | 0.65             | 0.0071  |
| EHI_103270A-p1        | T-complex protein 1 beta subunit, putative                         | 8       | 8              | 1.62             | 0.0071  |
| EHI_135470A-p1        | adenylate kinase                                                   | 11      | 11             | 1.55             | 0.0074  |
| EHI_140720A-p1        | myosin heavy chain                                                 | 14      | 14             | 0.75             | 0.0083  |
| EHI_155290A-p1        | actinin-like protein, putative                                     | 3       | 3              | 1.50             | 0.0084  |
| EHI_103260A-p1        | NADPH-dependent FMN reductase domain containing protein            | 1       | 1              | 0.55             | 0.0085  |
| EHI_104390A-p1        | actin binding protein, putative                                    | 23      | 23             | 0.70             | 0.0087  |
| EHI_068560A-p1        | metallo-beta-lactamase family protein                              | 2       | 2              | 0.70             | 0.0089  |
| EHI_088070A-p1        | ribosomal RNA methyltransferase, putative                          | 4       | 4              | 1.27             | 0.0090  |
| EHI_181140A-p1        | hypothetical protein, conserved                                    | 2       | 2              | 0.63             | 0.0090  |
| EHI_047810A-p1        | hypothetical protein                                               | 28      | 4              | 1.26             | 0.0092  |
| EHI_160940A-p1        | aldehyde-alcohol dehydrogenase 2, putative                         | 52      | 8              | 1.25             | 0.0092  |
| EHI_048630A-p1        | actin, putative                                                    | 9       | 4              | 1.43             | 0.0095  |
| EHI_186790A-p1        | hypothetical protein, conserved                                    | 6       | 6              | 0.55             | 0.0097  |
