# Supplementary material for: Coactosin Phosphorylation Controls Entamoeba histolytica Cell Membrane Protrusions and Cell Motility
Source: PubMed Central journal article supplement (PMC7407079; doi:10.1128/mbio.00660-20), 2020-08-04
Supplement: mBio.00660-20-st002.pdf [file mBio.00660-20-st002.pdf]

**Supplemental Table 2: Phosphopeptides with a fold change either larger than 1.5 fold or smaller than 0.67 (CV < 30%) following *EhMSP-1* silencing.**

| Sequence                | Master Protein Accessions               | Protein                                                         | EhMSP-1 (-) / WT Bio Rep 1 | EhMSP-1 (-) / WT Bio Rep 2 | P value | CV (%) | $\Delta$ mass [ppm] | XCorr |
|-------------------------|-----------------------------------------|-----------------------------------------------------------------|----------------------------|----------------------------|---------|--------|---------------------|-------|
| [K].SALDNGTYSPTR.[R]    | EHI_159500A [S244 (88.4) / S248 (88.4)] | Rho guanine nucleotide exchange factor                          | 100                        | 100                        | 1E-17   | 0.0    | -0.4                | 3.25  |
| [K].AGGADYSFNTTSN.[-]   | EHI_168340A [T146 (50) / S147 (50)]     | actin-binding protein, cofilin/tropomyosin family - EhCoactosin | 1.76                       | 2.59                       | 0.0172  | 27.0   | 0.28                | 3.62  |
| *[K].KAGGADYSFNTTSN.[-] | EHI_168340A [S147 (99.9)]               | actin-binding protein, cofilin/tropomyosin family - EhCoactosin | 1.33                       | 2.02                       | 0.1163  | 29.1   | -0.23               | 3.31  |
| [K].ELDSDEEQKELER.[Q]   | EHI_025370A [S410 (100)]                | hypothetical protein, conserved                                 | 2.18                       | 1.82                       | 0.0305  | 12.5   | -0.19               | 2.9   |
| [R].KSPTIDEIK.[Q]       | EHI_025430A [S134 (99.9)]               | hypothetical protein                                            | 0.57                       | 0.50                       | 0.0593  | 9.5    | 0.23                | 2.5   |
| [K].KTITPVVEDPCER.[I]   | EHI_050150A [T662 (50) / T664 (50)]     | HEAT repeat domain containing protein                           | 0.45                       | 0.63                       | 0.0582  | 24.5   | -0.69               | 3.9   |
| [R].RRESVDYTNNK.[W]     | EHI_110810A [S757 (100)]                | unconventional myosin IB                                        | 0.50                       | 0.50                       | 0.0358  | 0.4    | 1.41                | 2.01  |

\* [K].KAGGADYSFNTTSN.[-] (with 1 miscleavage), which was identified with the phosphorylation confidently located at S147, is included.
